# Supplementary material for: Development of Anticancer Peptides Using Artificial Intelligence and Combinational Therapy for Cancer Therapeutics
Source: MDPI journal article supplement (doi:10.3390/pharmaceutics14050997), 2022-05-06
Supplement: s1 [file s1]

**Table S1.** List of peptide sequences predicted by AI

| Sequence                          | Method | Treated cell | Inhibition index ( $\mu\text{M}$ )       | Reference  |
|-----------------------------------|--------|--------------|------------------------------------------|------------|
| GILSSIKGVAKGVAKNVAAQLDLTKCKITGC   | ML     | A549,        | A549: 15.32 [ $\text{IC}_{50}$ ],        | <b>[1]</b> |
|                                   |        | MCF7,        | MCF7: 45.25 [ $\text{IC}_{50}$ ],        |            |
|                                   |        | HeLa,        | HeLa: 37.23 [ $\text{IC}_{50}$ ]         |            |
|                                   |        | LoVo,        | LoVo: 59.78 [ $\text{IC}_{50}$ ],        |            |
|                                   |        | 293T         | 293T: 63.16 [ $\text{IC}_{50}$ ]         |            |
| GIFDVVKGVKGVGKNVAGSLLEQLKCKLSGGC  | ML     | A549,        | A549: 2.975 [ $\text{IC}_{50}$ ],        |            |
|                                   |        | MCF7,        | MCF7: 25.74 [ $\text{IC}_{50}$ ],        |            |
|                                   |        | HeLa,        | HeLa: 19.69 [ $\text{IC}_{50}$ ]         |            |
|                                   |        | LoVo,        | LoVo: 8.05 [ $\text{IC}_{50}$ ],         |            |
|                                   |        | 293T         | 293T: 5.832 [ $\text{IC}_{50}$ ]         |            |
| GVLGAVKDLLIGAGKSAAQSVLTKLSCKLSNDC | ML     | A549,        | A549: 27.31 [ $\text{IC}_{50}$ ],        |            |
|                                   |        | MCF7,        | MCF7: 41.21 [ $\text{IC}_{50}$ ],        |            |
|                                   |        | HeLa,        | HeLa: 52.83 [ $\text{IC}_{50}$ ]         |            |
|                                   |        | LoVo,        | LoVo: 55.22 [ $\text{IC}_{50}$ ],        |            |
|                                   |        | 293T         | 293T: 48.7 [ $\text{IC}_{50}$ ]          |            |
| GLFLDTLKGAADVAGKLEGLKCKIT         | ML     | A549,        | A549: 24.01 [ $\text{IC}_{50}$ ],        |            |
|                                   |        | MCF7,        | MCF7: 37.84 [ $\text{IC}_{50}$ ],        |            |
|                                   |        | HeLa,        | HeLa: 23.26 [ $\text{IC}_{50}$ ]         |            |
|                                   |        | LoVo,        | LoVo: 35.05 [ $\text{IC}_{50}$ ],        |            |
|                                   |        | 293T         | 293T: 50.66 [ $\text{IC}_{50}$ ]         |            |
| GLFDVVKGVKGVGAGKNVAGSLLEQLKCK     | ML     | A549,        | A549: >128 [ $\text{IC}_{50}$ ],         |            |
|                                   |        | MCF7,        | MCF7: >128 [ $\text{IC}_{50}$ ],         |            |
|                                   |        | HeLa,        | HeLa: >128 [ $\text{IC}_{50}$ ]          |            |
|                                   |        | LoVo,        | LoVo: 128 [ $\text{IC}_{50}$ ],          |            |
|                                   |        | 293T         | 293T: >128 [ $\text{IC}_{50}$ ]          |            |
| RLLRLIRKLII                       | ML     | MCF7,        | MCF7: $11 \pm 1$ [ $\text{EC}_{50}$ ],   | <b>[2]</b> |
|                                   |        | A549,        | A549: $21 \pm 1$ [ $\text{EC}_{50}$ ],   |            |
|                                   |        | LU1205,      | LU1205: $9 \pm 1$ [ $\text{EC}_{50}$ ],  |            |
|                                   |        | Jurkat,      | Jurkat: $39 \pm 1$ [ $\text{EC}_{50}$ ], |            |
|                                   |        | HDMEC        | HDMEC: $141 \pm 1$ [ $\text{EC}_{50}$ ]  |            |
| RLLRLIRKLIL                       | ML     | MCF7,        | MCF7: $9 \pm 1$ [ $\text{EC}_{50}$ ],    |            |
|                                   |        | A549,        | A549: $14 \pm 1$ [ $\text{EC}_{50}$ ],   |            |
|                                   |        | LU1205,      | LU1205: $7 \pm 1$ [ $\text{EC}_{50}$ ],  |            |
|                                   |        | Jurkat,      | Jurkat: $25 \pm 1$ [ $\text{EC}_{50}$ ], |            |
|                                   |        | HDMEC        | HDMEC: 125-250 [ $\text{EC}_{50}$ ]      |            |

|             |    |         |                                     |
|-------------|----|---------|-------------------------------------|
| LLLLLIRKLIK | ML | MCF7,   | MCF7: 11 ± 1 [EC <sub>50</sub> ],   |
|             |    | A549,   | A549: 22 ± 1 [EC <sub>50</sub> ],   |
|             |    | LU1205, | LU1205: 16 ± 1 [EC <sub>50</sub> ], |
|             |    | Jurkat, | Jurkat: 25 ± 1 [EC <sub>50</sub> ], |
|             |    | HDMEC   | HDMEC: 125-250 [EC <sub>50</sub> ]  |
| YLLYLIRKLIL | ML | MCF7,   | MCF7: 13 ± 1 [EC <sub>50</sub> ],   |
|             |    | A549,   | A549: 29 ± 1 [EC <sub>50</sub> ],   |
|             |    | LU1205, | LU1205: 14 ± 1 [EC <sub>50</sub> ], |
|             |    | Jurkat, | Jurkat: 22 ± 1 [EC <sub>50</sub> ], |
|             |    | HDMEC   | HDMEC: 256 ± 2 [EC <sub>50</sub> ]  |
| RLLRLIRKLIR | ML | MCF7,   | MCF7: 14 ± 1 [EC <sub>50</sub> ],   |
|             |    | A549,   | A549: 27 ± 1 [EC <sub>50</sub> ],   |
|             |    | LU1205, | LU1205: 16 ± 1 [EC <sub>50</sub> ], |
|             |    | Jurkat, | Jurkat: 27 ± 1 [EC <sub>50</sub> ], |
|             |    | HDMEC   | HDMEC: 138 ± 7 [EC <sub>50</sub> ]  |
| QLLQLIRKLII | ML | MCF7,   | MCF7: 22 ± 1 [EC <sub>50</sub> ],   |
|             |    | A549,   | A549: 29 ± 1 [EC <sub>50</sub> ],   |
|             |    | LU1205, | LU1205: 21 ± 1 [EC <sub>50</sub> ], |
|             |    | Jurkat, | Jurkat: 35 ± 1 [EC <sub>50</sub> ], |
|             |    | HDMEC   | HDMEC: 171 ± 1 [EC <sub>50</sub> ]  |
| QLLQLIRKLIM | ML | MCF7,   | MCF7: 33 ± 1 [EC <sub>50</sub> ],   |
|             |    | A549,   | A549: 33 ± 1 [EC <sub>50</sub> ],   |
|             |    | LU1205, | LU1205: 24 ± 1 [EC <sub>50</sub> ], |
|             |    | Jurkat, | Jurkat: 46 ± 1 [EC <sub>50</sub> ], |
|             |    | HDMEC   | HDMEC: 142 ± 2 [EC <sub>50</sub> ]  |
| MLLMLIRKLIL | ML | MCF7,   | MCF7: 16 ± 1 [EC <sub>50</sub> ],   |
|             |    | A549,   | A549: 58 ± 1 [EC <sub>50</sub> ],   |
|             |    | LU1205, | LU1205: 31 ± 1 [EC <sub>50</sub> ], |
|             |    | Jurkat, | Jurkat: 31 ± 1 [EC <sub>50</sub> ], |
|             |    | HDMEC   | HDMEC: 262 ± 1 [EC <sub>50</sub> ]  |
| QLLQLIRKLIR | ML | MCF7,   | MCF7: 53 ± 1 [EC <sub>50</sub> ],   |
|             |    | A549,   | A549: 60 ± 1 [EC <sub>50</sub> ],   |
|             |    | LU1205, | LU1205: 38 ± 1 [EC <sub>50</sub> ], |
|             |    | Jurkat, | Jurkat: 75 ± 1 [EC <sub>50</sub> ], |
|             |    | HDMEC   | HDMEC: 260 ± 1 [EC <sub>50</sub> ]  |
| QLLQLIRKLIK | ML | MCF7,   | MCF7: 50-100 [EC <sub>50</sub> ],   |
|             |    | A549,   | A549: 54 ± 1 [EC <sub>50</sub> ],   |

|             |    |                                               |                                                                                                                                                                                            |
|-------------|----|-----------------------------------------------|--------------------------------------------------------------------------------------------------------------------------------------------------------------------------------------------|
|             |    | LU1205,<br>Jurkat,<br>HDMEC                   | LU1205: 39 ± 1 [EC <sub>50</sub> ],<br>Jurkat: 69 ± 1 [EC <sub>50</sub> ],<br>HDMEC: ≈250 [EC <sub>50</sub> ]                                                                              |
| QLLQLIRKLIY | ML | MCF7,<br>A549,<br>LU1205,<br>Jurkat,<br>HDMEC | MCF7: 50-100 [EC <sub>50</sub> ],<br>A549: 61 ± 1 [EC <sub>50</sub> ],<br>LU1205: 29 ± 1 [EC <sub>50</sub> ],<br>Jurkat: 58 ± 1 [EC <sub>50</sub> ],<br>HDMEC: 349 ± 1 [EC <sub>50</sub> ] |
| LLLQLIRKLIL | ML | MCF7,<br>A549,<br>LU1205,<br>Jurkat,<br>HDMEC | MCF7: 10 ± 1 [EC <sub>50</sub> ],<br>A549: 30 ± 1 [EC <sub>50</sub> ],<br>LU1205: 12 ± 1 [EC <sub>50</sub> ],<br>Jurkat: 53 ± 1 [EC <sub>50</sub> ],<br>HDMEC: 154 ± 1 [EC <sub>50</sub> ] |
| TLLLLIRKLIL | ML | MCF7,<br>A549,<br>LU1205,<br>Jurkat,<br>HDMEC | MCF7: 38 ± 1 [EC <sub>50</sub> ],<br>A549: 79 ± 1 [EC <sub>50</sub> ],<br>LU1205: 16 ± 1 [EC <sub>50</sub> ],<br>Jurkat: 30 ± 1 [EC <sub>50</sub> ],<br>HDMEC: 348 ± 1 [EC <sub>50</sub> ] |
| RLLLLIRKLIL | ML | MCF7,<br>A549,<br>LU1205,<br>Jurkat,<br>HDMEC | MCF7: 24 ± 1 [EC <sub>50</sub> ],<br>A549: 35 ± 1 [EC <sub>50</sub> ],<br>LU1205: 18 ± 1 [EC <sub>50</sub> ],<br>Jurkat: 40 ± 1 [EC <sub>50</sub> ],<br>HDMEC: 160 ± 1 [EC <sub>50</sub> ] |
| LLLLLIRKLIL | ML | MCF7,<br>A549,<br>LU1205,<br>Jurkat,<br>HDMEC | MCF7: 25 ± 1 [EC <sub>50</sub> ],<br>A549: >100 [EC <sub>50</sub> ],<br>LU1205: 48 ± 1 [EC <sub>50</sub> ],<br>Jurkat: 50 ± 1 [EC <sub>50</sub> ],<br>HDMEC: 278 ± 1 [EC <sub>50</sub> ]   |
| QLLLLIRKLIL | ML | MCF7,<br>A549,<br>LU1205,<br>Jurkat,<br>HDMEC | MCF7: 63 ± 1 [EC <sub>50</sub> ],<br>A549: >100 [EC <sub>50</sub> ],<br>LU1205: 44 ± 1 [EC <sub>50</sub> ],<br>Jurkat: 39 ± 1 [EC <sub>50</sub> ],<br>HDMEC: 271 ± 1 [EC <sub>50</sub> ]   |
| QLLLLIRKLIV | ML | MCF7,<br>A549,<br>LU1205,<br>Jurkat,          | MCF7: 77 ± 1 [EC <sub>50</sub> ],<br>A549: >100 [EC <sub>50</sub> ],<br>LU1205: 53 ± 1 [EC <sub>50</sub> ],<br>Jurkat: >100 [EC <sub>50</sub> ],                                           |

|                        |    |                                               |                                                                                                                                                                                                |
|------------------------|----|-----------------------------------------------|------------------------------------------------------------------------------------------------------------------------------------------------------------------------------------------------|
|                        |    | HDMEC                                         | HDMEC: $339 \pm 1$ [EC <sub>50</sub> ]                                                                                                                                                         |
| CLLLLIRKLIL            | ML | MCF7,<br>A549,<br>LU1205,<br>Jurkat,<br>HDMEC | MCF7: >100 [EC <sub>50</sub> ],<br>A549: >100 [EC <sub>50</sub> ],<br>LU1205: $76 \pm 1$ [EC <sub>50</sub> ],<br>Jurkat: >100 [EC <sub>50</sub> ],<br>HDMEC: $\approx 500$ [EC <sub>50</sub> ] |
| KLWKKIEKLIKLLTSIR      | DL | MCF7                                          | $47 \pm 3$ [EC <sub>50</sub> ],<br>$236 \pm 13$ [HC <sub>50</sub> ],<br>$5.1 \pm 0.6$ [TI]                                                                                                     |
| YIWARAERVWLWWGKFLSL    | DL | MCF7                                          | $56 \pm 3$ [EC <sub>50</sub> ],<br>inactive [HC <sub>50</sub> ],<br>>7 [TI]                                                                                                                    |
| ELAKKLTCLKRQLHRIW      | DL | MCF7                                          | inactive [EC <sub>50</sub> ],<br>inactive [HC <sub>50</sub> ],<br>n.d. [TI]                                                                                                                    |
| DLFKQLQRLFLGILYCLYKIW  | DL | MCF7                                          | $47 \pm 4$ [EC <sub>50</sub> ],<br>$132 \pm 16$ [HC <sub>50</sub> ],<br>$2.8 \pm 0.6$ [TI]                                                                                                     |
| KLIDQWKKVLYHVE         | DL | MCF7                                          | inactive [EC <sub>50</sub> ],<br>inactive [HC <sub>50</sub> ],<br>n.d. [TI]                                                                                                                    |
| AIKKFGPLAKIVAKV        | DL | MCF7                                          | $95 \pm 4$ [EC <sub>50</sub> ],<br>inactive [HC <sub>50</sub> ],<br>>4 [TI]                                                                                                                    |
| RWNGRIIKGFYNLVKIWKDLKG | DL | MCF7                                          | $42 \pm 4$ [EC <sub>50</sub> ],<br>$89 \pm 6$ [HC <sub>50</sub> ],<br>$2.1 \pm 03$ [TI]                                                                                                        |
| KVWKIKKNIRLLHGIKRGWKG  | DL | MCF7                                          | $34 \pm 4$ [EC <sub>50</sub> ],<br>inactive [HC <sub>50</sub> ],<br>>11 [TI]                                                                                                                   |
| GFWARIGKVFAAVKNL       | DL | MCF7                                          | $101 \pm 4$ [EC <sub>50</sub> ],<br>inactive [HC <sub>50</sub> ],<br>>4 [TI]                                                                                                                   |

[3]

|                            |    |               |                                                                                  |
|----------------------------|----|---------------|----------------------------------------------------------------------------------|
| AFLYRLTRQIRPWWRWLYKW       | DL | MCF7          | 45.5 ± 0.8 [EC <sub>50</sub> ],<br>34 ± 5 [HC <sub>50</sub> ],<br>0.7 ± 0.1 [TI] |
| RIWGHKHSRYIKIVKRLIQ        | DL | MCF7          | 50 ± 10 [EC <sub>50</sub> ],<br>inactive [HC <sub>50</sub> ],<br>>8 [TI]         |
| QIWHKIRKLWQIIKDGF          | DL | MCF7          | 16.1 ± 0.3 [EC <sub>50</sub> ],<br>23 ± 5 [HC <sub>50</sub> ],<br>1.4 ± 0.3 [TI] |
| ALFGILKKAFGKILTIFAGLPVV    | ML | MCF7,<br>A549 | MCF7: 9.8 [EC <sub>50</sub> ],<br>A549: 8.6 [EC <sub>50</sub> ]                  |
| GLGDFIKAIKHLGPLIGILPSKLVAA | ML | MCF7,<br>A549 | MCF7: 4.5 [EC <sub>50</sub> ],<br>A549: 11.3 [EC <sub>50</sub> ]                 |
| GLKDPLKSVAKHLVK            | ML | MCF7,<br>A549 | MCF7: >100 [EC <sub>50</sub> ],<br>A549: >100 [EC <sub>50</sub> ]                |
| GLVMLVKKAGLT               | ML | MCF7,<br>A549 | MCF7: >100 [EC <sub>50</sub> ],<br>A549 >100: [EC <sub>50</sub> ]                |
| IIFGVIKALSG                | ML | MCF7,<br>A549 | MCF7: >100 [EC <sub>50</sub> ],<br>A549: >100 [EC <sub>50</sub> ]                |
| FLGPTIGKIAKFILKHIVGLGDAALV | ML | MCF7,<br>A549 | MCF7: 2.6 [EC <sub>50</sub> ],<br>A549: 10.7 [EC <sub>50</sub> ]                 |
| GIVTILKGAVGVILGGL          | ML | MCF7,<br>A549 | MCF7: >100 [EC <sub>50</sub> ],<br>A549: >100 [EC <sub>50</sub> ]                |
| GLFKIISGIA                 | ML | MCF7,<br>A549 | MCF7: >100 [EC <sub>50</sub> ],<br>A549: >100 [EC <sub>50</sub> ]                |
| GLGMIAHGV                  | ML | MCF7,<br>A549 | MCF7: >100 [EC <sub>50</sub> ],<br>A549: >100 [EC <sub>50</sub> ]                |
| GLWKILKKGA                 | ML | MCF7,<br>A549 | MCF7: >100 [EC <sub>50</sub> ],<br>A549: >100 [EC <sub>50</sub> ]                |
| GLFAILKKLVNLVG             | ML | MCF7,<br>A549 | MCF7: 2.3 [EC <sub>50</sub> ],<br>A549: 4.6 [EC <sub>50</sub> ]                  |

[4]

|                             |    |               |                                                                   |
|-----------------------------|----|---------------|-------------------------------------------------------------------|
| GLFKIISKLA KKA              | ML | MCF7,<br>A549 | MCF7: 27.7 [EC <sub>50</sub> ],<br>A549: 36.3 [EC <sub>50</sub> ] |
| GLPLFLKKLGS AV              | ML | MCF7,<br>A549 | MCF7: >100 [EC <sub>50</sub> ],<br>A549: >100 [EC <sub>50</sub> ] |
| GLWGVIKALGGHVG              | ML | MCF7,<br>A549 | MCF7: >100 [EC <sub>50</sub> ],<br>A549: 69.3 [EC <sub>50</sub> ] |
| GLFLVALKQVATIKKLIGGLFAVVGVA | ML | MCF7,<br>A549 | Synthesis failed                                                  |

---

IC<sub>50</sub>: Half-inhibitory concentration, EC<sub>50</sub>: half-effective concentration, HC<sub>50</sub>: half-hemolytic concentration, TI: Therapeutic index (HC<sub>50</sub>/ EC<sub>50</sub>), AI: Artificial intelligence, n.d.: no data, ML: Machine learning, DL: Deep learning

## References

1. Zhao, Y.; Wang, S.; Fei, W.; Feng, Y.; Shen, L.; Yang, X.; Wang, M.; Wu, M. Prediction of Anticancer Peptides with High Efficacy and Low Toxicity by Hybrid Model Based on 3D Structure of Peptides. *Int. J. Mol. Sci.* **2021**, *22*, 5630.
2. Grisoni, F.; Neuhaus, C.S.; Gabernet, G.; Müller, A.T.; Hiss, J.A.; Schneider, G. Designing anticancer peptides by constructive machine learning. *ChemMedChem.* **2018**, *13*, 1300-1302.
3. Grisoni, F.; Neuhaus, C.S.; Hishinuma, M.; Gabernet, G.; Hiss, J.A.; Kotera, M.; Schneider, G. De novo design of anticancer peptides by ensemble artificial neural networks. *J. Mol. Model.* **2019**, *25*, 112.
4. Lin, Y.C.; Lim, Y.F.; Russo, E.; Schneider, P.; Bolliger, L.; Edenharter, A.; Altmann, K.H.; Halin, C.; Hiss, J.A.; Schneider, G. Multidimensional design of anticancer peptides. *Angew. Chem. Int. Ed.* **2015**, *54*, 10370-10374.
